# Supplementary material
Source: publisher figshare collection journal article supplement (https://diabetesjournals.figshare.com/articles/dataset/_/22220875)
Supplement: Supplementary file 2 [file 1]

## **QUID NASH collaborators**

Christophe Junot

Bernard Van Beers

Christian Boitard

Nathalie de Préville

Isabelle Durand Zaleski

Pierre-Emmanuel Rautou

Marco Dioguardi

Valérie Vilgrain

Jean-Pierre Riveline
